# Supplementary material for: The influence of daily air temperature variability on arterial blood pressure: Findings from a Kaunas cohort study
Source: Research Square preprint supplement (doi:10.21203/rs.3.rs-6413166/v1), 2025-05-20
Supplement: Supplementary file 1 [file e0b9754ad1adbb3768bdf878.docx]

**Table S1.** Descriptive statistics of PM10 and the variables of temperature variability on days of the surveys (N=7,077).

| **Variable** | **Mean** | **SD** | **Min** | **Q1** | **Median** | **Q3** | **Max** |
| --- | --- | --- | --- | --- | --- | --- | --- |
| T (°C) | 7.41 | 7.01 | -15.4 | 2.9 | 7.3 | 12.4 | 24.1 |
| RH (%) | 80.2 | 12.6 | 43.0 | 71.0 | 83.0 | 91.0 | 100 |
| AP (hPa) | 1014.5 | 10.0 | 980 | 1007 | 1015 | 1021 | 1045 |
| WS (knots) | 7.18 | 2.9 | 1.9 | 5.0 | 6.9 | 8.7 | 17.2 |
| DTR (°C) | 7.64 | 4.43 | 0.6 | 4.0 | 6.8 | 11.0 | 20.0 |
| TSD (°C) | 2.06 | 1.33 | 0.12 | 0.95 | 1.69 | 3.01 | 5.59 |
| TSDF (°C) | 2.21 | 1.71 | 0 | 0.80 | 1.68 | 3.26 | 7.18 |
| DTR01 (°C) | 9.89 | 4.50 | 1.70 | 6.0 | 9.9 | 13.7 | 21.30 |
| DTV01 (°C) | 4.74 | 2.05 | 0.79 | 2.71 | 4.59 | 6.48 | 10.83 |
| PM10 (μg/m3) | 34.4 | 23.9 | 4.7 | 18.6 | 27.2 | 41.9 | 147.9 |
| **September-April** | |  |  |  |  |  |  |
| T (°C) | 5.2 | 6.1 | -15.4 | 1.3 | 5.3 | 9.2 | 18.1 |
| DTR (°C) | 6.6 | 4.2 | 0.6 | 3.4 | 5.4 | 9.0 | 20.0 |
| TSD (°C) | 1.76 | 1.22 | 0.12 | 0.83 | 1.38 | 2.47 | 5.30 |
| TSDF (°C) | 1.83 | 1.56 | 0 | 0.69 | 1.29 | 2.45 | 7.18 |
| DTR01 (°C) | 8.76 | 4.31 | 1.70 | 5.2 | 7.9 | 12.1 | 20.9 |
| DTV01 (°C) | 4.16 | 2.19 | 0.79 | 2.41 | 3.59 | 5.60 | 10.83 |
| PM10 (μg/m3) | 35.6 | 24.9 | 4.7 | 19.2 | 28.0 | 44.0 | 147.9 |
| **May-June** |  |  |  |  |  |  |  |
| T (°C) | 14.6 | 4.3 | 4.4 | 11.1 | 14.4 | 18.2 | 24.1 |
| DTR (°C) | 11.0 | 3.5 | 2.8 | 8.4 | 10.7 | 13.8 | 18.4 |
| TSD (°C) | 3.02 | 1.21 | 0.39 | 2.20 | 3.02 | 3.92 | 5.59 |
| TSDF (°C) | 3.41 | 1.62 | 0.49 | 2.11 | 3.25 | 4.51 | 7.07 |
| DTR01 (°C) | 13.50 | 2.89 | 4.8 | 12.0 | 13.7 | 15.3 | 21.30 |
| DTV01 (°C) | 6.62 | 1.54 | 2.35 | 5.86 | 6.54 | 7.75 | 9.77 |
| PM10 (μg/m3) | 30.8 | 20.0 | 10.2 | 18.2 | 25.7 | 34.5 | 117.9 |
